# Supplementary material for: Intercalation of a manganese(ii)-thiacalixarene luminescent complex in layered double hydroxides: synthesis and photophysical characterization
Source: Royal Society of Chemistry journal article supplement (doi:10.1039/d0nj04890a), 2020-12-08
Supplement: d0nj04890a1.pdf [file d0nj04890a1.pdf]

## Supporting Information

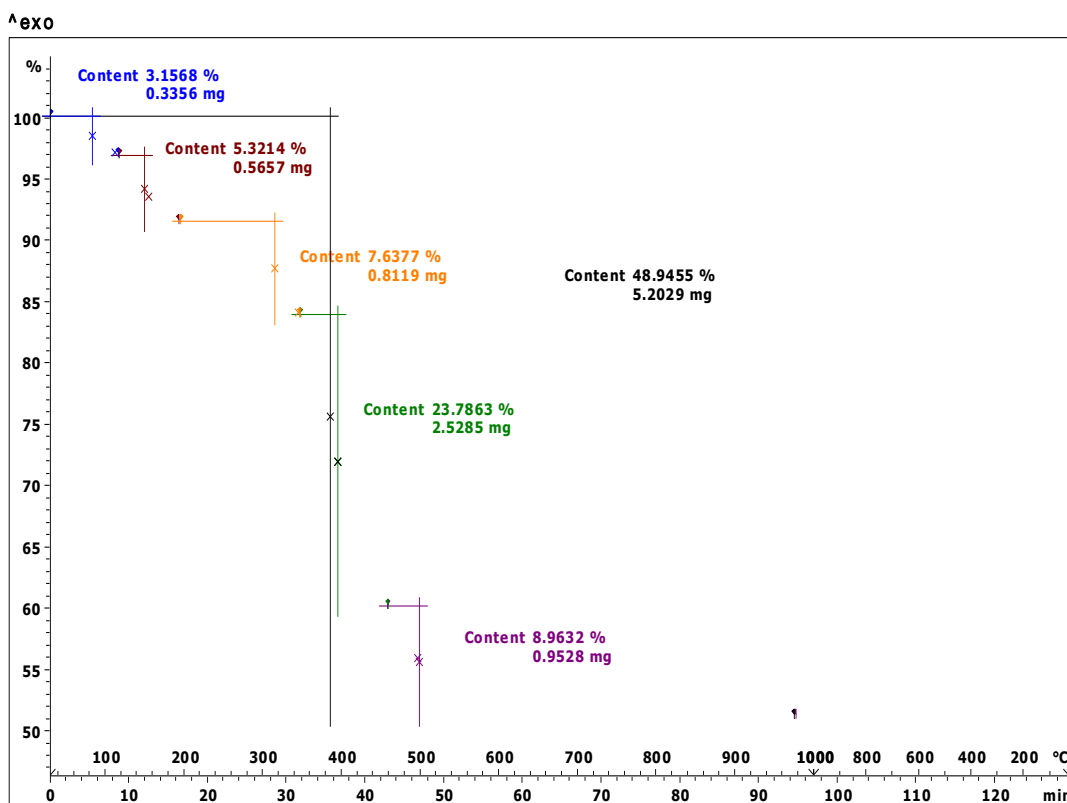

Figure S1: TGA of Mg-Al-NO<sub>3</sub> LDHs.

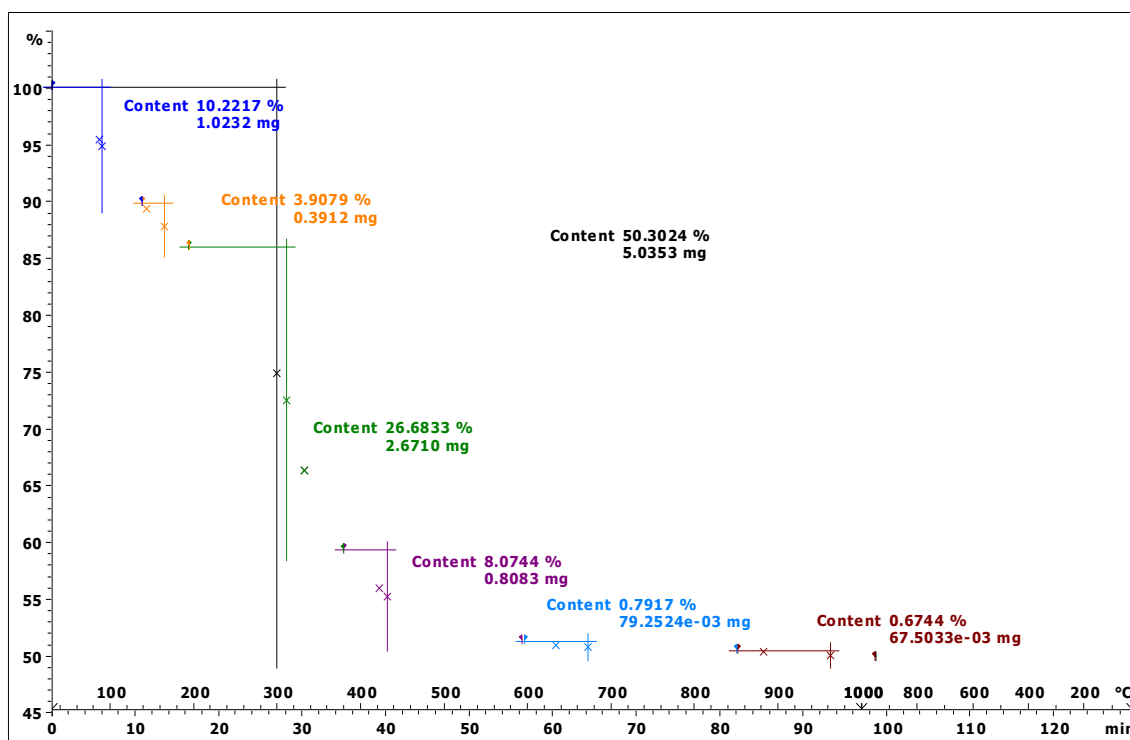

Figure S2: TGA of compound LDH-Complex 1.

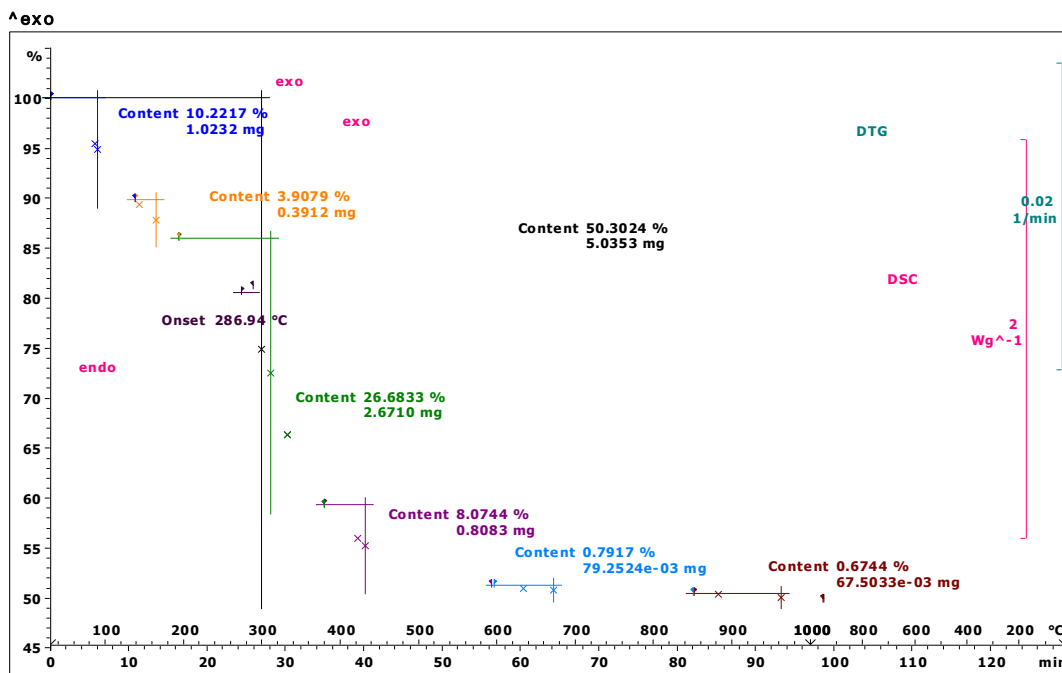

Figure S3: TGA (dark curve), DTG (green curve) and DSC (pink curve) of LDH-Complex 1.

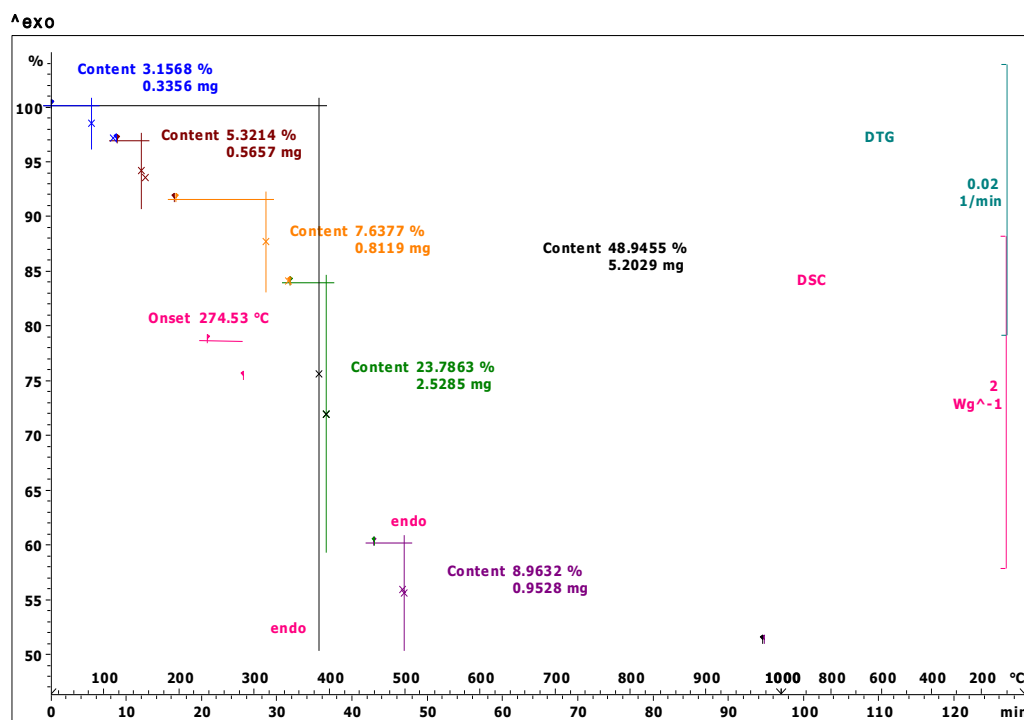

Figure S4: TGA (dark curve), DTG (green curve) and DSC (pink curve) of Mg-Al-NO<sub>3</sub> LDHs.

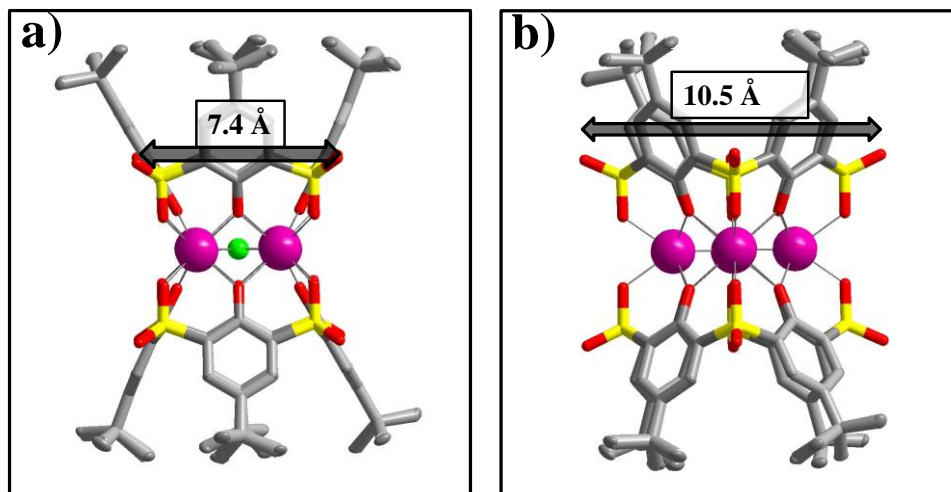

**Figure S5:**  $[(\text{ThiaSO}_2)_2(\text{Mn}^{\text{II}})_4\text{F}]\text{K}$  complex width dimension measured from single crystal X-Ray Diffraction structure in two directions.

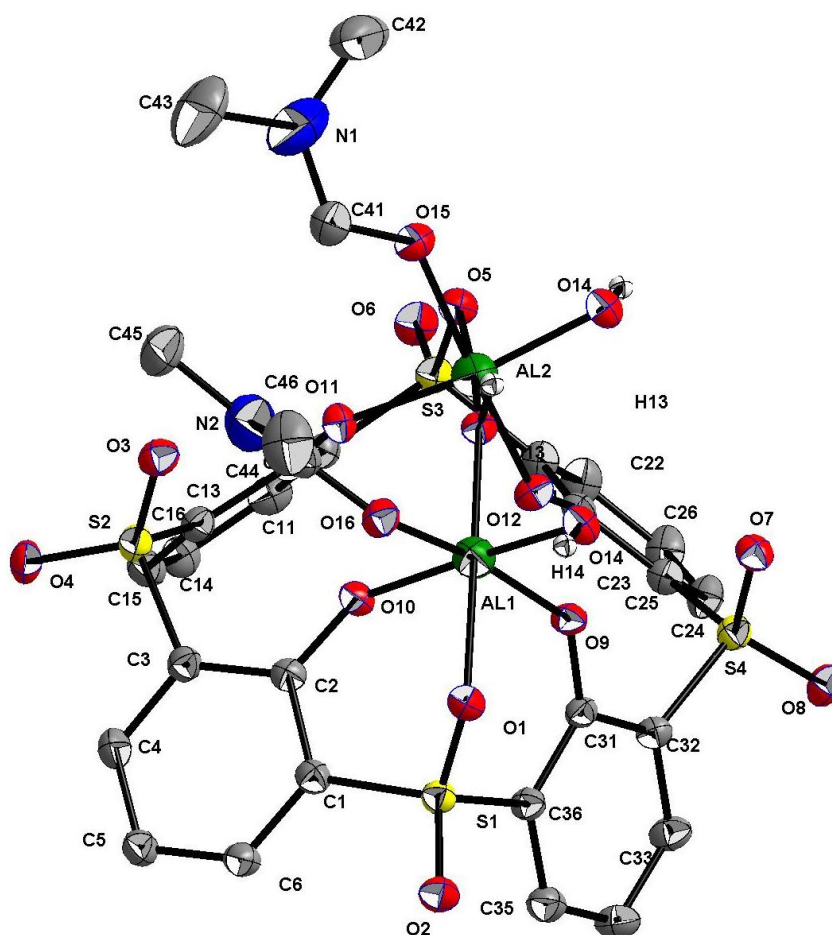

**Figure S6:** ORTEP<sup>i</sup> diagram of asymmetric unit of tetra-aluminium complex of  $\text{Al}_4(\text{ThiaSO}_2)_2$  with thermal ellipsoids at 50% probability. Hydrogen atoms and tertbutyl groups are omitted for clarity.

**Table S1:** Crystal Data of Al<sub>4</sub>(ThiaSO<sub>2</sub>)<sub>2</sub> complex.

|                              |                                                                                                |                       |               |
|------------------------------|------------------------------------------------------------------------------------------------|-----------------------|---------------|
| Formula                      | C <sub>92</sub> H <sub>120</sub> Al <sub>4</sub> N <sub>4</sub> O <sub>32</sub> S <sub>8</sub> | Z'                    | 0.5           |
| $D_{calc.}/g\text{ cm}^{-3}$ | 1.157                                                                                          | Wavelength/Å          | 0.71073       |
| $\mu/\text{mm}^{-1}$         | 0.240                                                                                          | Radiation type        | Mo K $\alpha$ |
| Formula Weight               | 2158.31                                                                                        | $\theta_{min}/^\circ$ | 2.752         |
| Color                        | colorless                                                                                      | $\theta_{max}/^\circ$ | 29.266        |
| Shape                        | block                                                                                          | Measured Refl's.      | 68248         |
| Size/mm <sup>3</sup>         | 0.34 × 0.15 × 0.13                                                                             | Ind't Refl's          | 15063         |
| T/K                          | 293.00                                                                                         | Refl's with I > 2(I)  | 8109          |
| Crystal System               | monoclinic                                                                                     | $R_{int}$             | 0.0862        |
| Space Group                  | $P2_1/n$                                                                                       | Parameters            | 717           |
| $a/\text{Å}$                 | 13.9486(4)                                                                                     | Restraints            | 152           |
| $b/\text{Å}$                 | 22.9133(7)                                                                                     | Largest Peak          | 0.372         |
| $c/\text{Å}$                 | 20.0205(6)                                                                                     | Deepest Hole          | -0.308        |
| $\alpha/^\circ$              | 90                                                                                             | Goof                  | 1.000         |
| $\beta/^\circ$               | 104.421(3)                                                                                     | $wR_2$ (all data)     | 0.1567        |
| $\gamma/^\circ$              | 90                                                                                             | $wR_2$                | 0.1327        |
| $V/\text{Å}^3$               | 6197.1(3)                                                                                      | $R_1$ (all data)      | 0.1269        |
| Z                            | 2                                                                                              | $R_1$                 | 0.0653        |

**Table S2:** Bond Lengths in Å for Al<sub>4</sub>(ThiaSO<sub>2</sub>)<sub>2</sub> complex.

| Atom | Atom             | Length/Å   | Atom | Atom | Length/Å |
|------|------------------|------------|------|------|----------|
| S1   | O1               | 1.4648(19) | C4   | C5   | 1.384(4) |
| S1   | O2               | 1.429(2)   | C5   | C6   | 1.392(4) |
| S1   | C1               | 1.742(3)   | C5   | C7   | 1.538(4) |
| S1   | C36              | 1.755(3)   | C7   | C8   | 1.523(5) |
| S2   | O3               | 1.437(2)   | C7   | C9   | 1.537(5) |
| S2   | O4               | 1.439(2)   | C7   | C10  | 1.521(5) |
| S2   | C3               | 1.779(3)   | C11  | C12  | 1.420(4) |
| S2   | C16              | 1.769(3)   | C11  | C16  | 1.420(4) |
| S3   | O5               | 1.464(2)   | C12  | C13  | 1.391(4) |
| S3   | O6               | 1.429(2)   | C13  | C14  | 1.391(4) |
| S3   | C12              | 1.749(3)   | C14  | C15  | 1.379(4) |
| S3   | C21              | 1.743(3)   | C14  | C17  | 1.537(4) |
| S4   | O7               | 1.429(2)   | C15  | C16  | 1.383(4) |
| S4   | O8               | 1.442(2)   | C17  | C18A | 1.539(6) |
| S4   | C23              | 1.772(3)   | C17  | C18B | 1.502(7) |
| S4   | C32              | 1.766(3)   | C17  | C19A | 1.536(6) |
| Al1  | O1               | 2.068(2)   | C17  | C19B | 1.536(6) |
| Al1  | O9               | 1.837(2)   | C17  | C20A | 1.507(6) |
| Al1  | O10              | 1.8799(19) | C17  | C20B | 1.530(7) |
| Al1  | O13              | 1.848(2)   | C21  | C22  | 1.423(4) |
| Al1  | O14 <sup>1</sup> | 1.871(2)   | C21  | C26  | 1.378(4) |
| Al1  | O16              | 1.928(2)   | C22  | C23  | 1.405(4) |
| Al2  | O5               | 2.107(2)   | C23  | C24  | 1.395(4) |
| Al2  | O11              | 1.8428(19) | C24  | C25  | 1.386(4) |
| Al2  | O12              | 1.881(2)   | C25  | C26  | 1.385(4) |
| Al2  | O13              | 1.827(2)   | C25  | C27  | 1.537(5) |
| Al2  | O14              | 1.849(2)   | C27  | C28A | 1.551(6) |
| Al2  | O15              | 1.927(2)   | C27  | C28B | 1.497(7) |
| O9   | C31              | 1.285(3)   | C27  | C29A | 1.516(6) |
| O10  | C2               | 1.299(3)   | C27  | C29B | 1.541(7) |
| O11  | C11              | 1.287(3)   | C27  | C30A | 1.496(6) |
| O12  | C22              | 1.303(3)   | C27  | C30B | 1.501(7) |
| O15  | C41              | 1.223(4)   | C31  | C32  | 1.432(4) |
| O16  | C44              | 1.247(3)   | C31  | C36  | 1.420(4) |
| N1   | C41              | 1.318(4)   | C32  | C33  | 1.389(4) |
| N1   | C42              | 1.427(5)   | C33  | C34  | 1.390(4) |
| N1   | C43              | 1.447(5)   | C34  | C35  | 1.385(4) |
| N2   | C44              | 1.314(4)   | C34  | C37  | 1.532(4) |
| N2   | C45              | 1.458(4)   | C35  | C36  | 1.392(4) |
| N2   | C46              | 1.450(5)   | C37  | C38  | 1.536(6) |
| C1   | C2               | 1.421(4)   | C37  | C39  | 1.518(6) |
| C1   | C6               | 1.381(4)   | C37  | C40  | 1.511(5) |
| C2   | C3               | 1.411(4)   | ---- |      |          |
| C3   | C4               | 1.387(4)   |      |      |          |

**Table S3:** Bond Angles in ° for Al<sub>4</sub>(ThiaSO<sub>2</sub>)<sub>2</sub> complex.

| Atom | Atom | Atom | Angle/°    | Atom | Atom | Atom | Angle/°    |
|------|------|------|------------|------|------|------|------------|
| O1   | S1   | C1   | 107.36(12) | C16  | S2   | C3   | 106.44(13) |
| O1   | S1   | C36  | 106.83(12) | O5   | S3   | C12  | 108.18(13) |
| O2   | S1   | O1   | 116.07(12) | O5   | S3   | C21  | 106.42(12) |
| O2   | S1   | C1   | 108.58(13) | O6   | S3   | O5   | 116.73(13) |
| O2   | S1   | C36  | 109.63(13) | O6   | S3   | C12  | 108.99(13) |
| C1   | S1   | C36  | 108.10(13) | O6   | S3   | C21  | 109.03(13) |
| O3   | S2   | O4   | 116.68(13) | C21  | S3   | C12  | 107.09(14) |
| O3   | S2   | C3   | 110.65(13) | O7   | S4   | O8   | 116.74(12) |
| O3   | S2   | C16  | 110.97(13) | O7   | S4   | C23  | 109.28(13) |
| O4   | S2   | C3   | 105.45(13) | O7   | S4   | C32  | 110.13(13) |
| O4   | S2   | C16  | 106.01(13) | O8   | S4   | C23  | 106.13(13) |

| Atom             | Atom | Atom             | Angle/°    | Atom | Atom | Atom | Angle/°   |
|------------------|------|------------------|------------|------|------|------|-----------|
| O8               | S4   | C32              | 106.24(13) | C8   | C7   | C9   | 108.3(3)  |
| C32              | S4   | C23              | 107.92(13) | C9   | C7   | C5   | 108.0(3)  |
| O9               | Al1  | O1               | 86.21(8)   | C10  | C7   | C5   | 109.8(3)  |
| O9               | Al1  | O10              | 93.38(9)   | C10  | C7   | C8   | 109.2(3)  |
| O9               | Al1  | O13              | 94.11(9)   | C10  | C7   | C9   | 109.9(3)  |
| O9               | Al1  | O14 <sup>1</sup> | 91.57(9)   | O11  | C11  | C12  | 124.4(3)  |
| O9               | Al1  | O16              | 168.08(10) | O11  | C11  | C16  | 122.0(3)  |
| O10              | Al1  | O1               | 87.84(8)   | C12  | C11  | C16  | 113.6(3)  |
| O10              | Al1  | O16              | 89.57(9)   | C11  | C12  | S3   | 120.9(2)  |
| O13              | Al1  | O1               | 179.26(9)  | C13  | C12  | S3   | 115.8(2)  |
| O13              | Al1  | O10              | 91.48(9)   | C13  | C12  | C11  | 123.3(3)  |
| O13              | Al1  | O14 <sup>1</sup> | 94.38(9)   | C14  | C13  | C12  | 121.5(3)  |
| O13              | Al1  | O16              | 97.36(9)   | C13  | C14  | C17  | 121.3(3)  |
| O14 <sup>1</sup> | Al1  | O1               | 86.27(9)   | C15  | C14  | C13  | 116.0(3)  |
| O14 <sup>1</sup> | Al1  | O10              | 172.05(10) | C15  | C14  | C17  | 122.6(3)  |
| O14 <sup>1</sup> | Al1  | O16              | 84.36(9)   | C14  | C15  | C16  | 123.5(3)  |
| O16              | Al1  | O1               | 82.36(9)   | C11  | C16  | S2   | 122.5(2)  |
| O11              | Al2  | O5               | 84.44(8)   | C15  | C16  | S2   | 115.5(2)  |
| O11              | Al2  | O12              | 92.13(9)   | C15  | C16  | C11  | 122.0(3)  |
| O11              | Al2  | O14              | 169.81(10) | C14  | C17  | C18A | 111.4(4)  |
| O11              | Al2  | O15              | 88.13(9)   | C18B | C17  | C14  | 110.4(5)  |
| O12              | Al2  | O5               | 86.98(8)   | C18B | C17  | C19B | 112.8(7)  |
| O12              | Al2  | O15              | 168.76(10) | C18B | C17  | C20B | 111.8(8)  |
| O13              | Al2  | O5               | 175.16(9)  | C19A | C17  | C14  | 109.2(4)  |
| O13              | Al2  | O11              | 93.01(9)   | C19A | C17  | C18A | 105.1(6)  |
| O13              | Al2  | O12              | 97.25(9)   | C19B | C17  | C14  | 110.8(4)  |
| O13              | Al2  | O14              | 96.06(9)   | C20A | C17  | C14  | 111.0(5)  |
| O13              | Al2  | O15              | 93.97(9)   | C20A | C17  | C18A | 105.8(7)  |
| O14              | Al2  | O5               | 86.17(9)   | C20A | C17  | C19A | 114.2(7)  |
| O14              | Al2  | O12              | 91.32(9)   | C20B | C17  | C14  | 106.1(5)  |
| O14              | Al2  | O15              | 86.63(10)  | C20B | C17  | C19B | 104.7(7)  |
| O15              | Al2  | O5               | 81.85(9)   | C22  | C21  | S3   | 117.1(2)  |
| S1               | O1   | Al1              | 119.95(11) | C26  | C21  | S3   | 119.7(2)  |
| S3               | O5   | Al2              | 118.97(11) | C26  | C21  | C22  | 123.2(3)  |
| C31              | O9   | Al1              | 134.83(17) | O12  | C22  | C21  | 121.5(3)  |
| C2               | O10  | Al1              | 136.06(18) | O12  | C22  | C23  | 124.3(3)  |
| C11              | O11  | Al2              | 133.88(18) | C23  | C22  | C21  | 114.2(3)  |
| C22              | O12  | Al2              | 135.34(18) | C22  | C23  | S4   | 121.4(2)  |
| Al2              | O13  | Al1              | 138.42(11) | C24  | C23  | S4   | 116.8(2)  |
| Al2              | O14  | Al1 <sup>1</sup> | 140.23(12) | C24  | C23  | C22  | 121.6(3)  |
| C41              | O15  | Al2              | 129.9(2)   | C25  | C24  | C23  | 123.0(3)  |
| C44              | O16  | Al1              | 125.7(2)   | C24  | C25  | C27  | 122.8(3)  |
| C41              | N1   | C42              | 120.9(3)   | C26  | C25  | C24  | 116.2(3)  |
| C41              | N1   | C43              | 119.5(4)   | C26  | C25  | C27  | 121.0(3)  |
| C42              | N1   | C43              | 119.6(4)   | C21  | C26  | C25  | 121.7(3)  |
| C44              | N2   | C45              | 120.5(3)   | C25  | C27  | C28A | 108.2(4)  |
| C44              | N2   | C46              | 121.0(3)   | C25  | C27  | C29B | 105.0(5)  |
| C46              | N2   | C45              | 118.1(3)   | C28B | C27  | C25  | 116.1(6)  |
| C2               | C1   | S1               | 117.8(2)   | C28B | C27  | C29B | 109.6(10) |
| C6               | C1   | S1               | 119.5(2)   | C28B | C27  | C30B | 114.6(10) |
| C6               | C1   | C2               | 122.8(3)   | C29A | C27  | C25  | 106.9(4)  |
| O10              | C2   | C1               | 122.7(2)   | C29A | C27  | C28A | 107.8(6)  |
| O10              | C2   | C3               | 122.9(3)   | C30A | C27  | C25  | 114.3(4)  |
| C3               | C2   | C1               | 114.4(2)   | C30A | C27  | C28A | 103.9(6)  |
| C2               | C3   | S2               | 122.3(2)   | C30A | C27  | C29A | 115.4(6)  |
| C4               | C3   | S2               | 116.0(2)   | C30B | C27  | C25  | 109.3(6)  |
| C4               | C3   | C2               | 121.7(3)   | C30B | C27  | C29B | 100.7(10) |
| C5               | C4   | C3               | 123.2(3)   | O9   | C31  | C32  | 121.6(2)  |
| C4               | C5   | C6               | 115.9(3)   | O9   | C31  | C36  | 125.1(2)  |
| C4               | C5   | C7               | 123.0(3)   | C36  | C31  | C32  | 113.3(2)  |
| C6               | C5   | C7               | 121.0(3)   | C31  | C32  | S4   | 122.2(2)  |
| C1               | C6   | C5               | 122.0(3)   | C33  | C32  | S4   | 115.6(2)  |
| C8               | C7   | C5               | 111.6(3)   | C33  | C32  | C31  | 122.2(3)  |

| <b>Atom</b> | <b>Atom</b> | <b>Atom</b> | <b>Angle/°</b> |
|-------------|-------------|-------------|----------------|
| C32         | C33         | C34         | 122.9(3)       |
| C33         | C34         | C37         | 121.0(3)       |
| C35         | C34         | C33         | 116.2(3)       |
| C35         | C34         | C37         | 122.5(3)       |
| C34         | C35         | C36         | 121.9(3)       |
| C31         | C36         | S1          | 120.5(2)       |
| C35         | C36         | S1          | 115.9(2)       |
| C35         | C36         | C31         | 123.4(3)       |
| C34         | C37         | C38         | 110.2(3)       |
| C39         | C37         | C34         | 107.8(3)       |
| C39         | C37         | C38         | 109.1(4)       |
| C40         | C37         | C34         | 112.5(3)       |
| C40         | C37         | C38         | 107.7(4)       |
| C40         | C37         | C39         | 109.6(4)       |
| O15         | C41         | N1          | 122.9(3)       |
| O16         | C44         | N2          | 122.6(3)       |

-----  
1

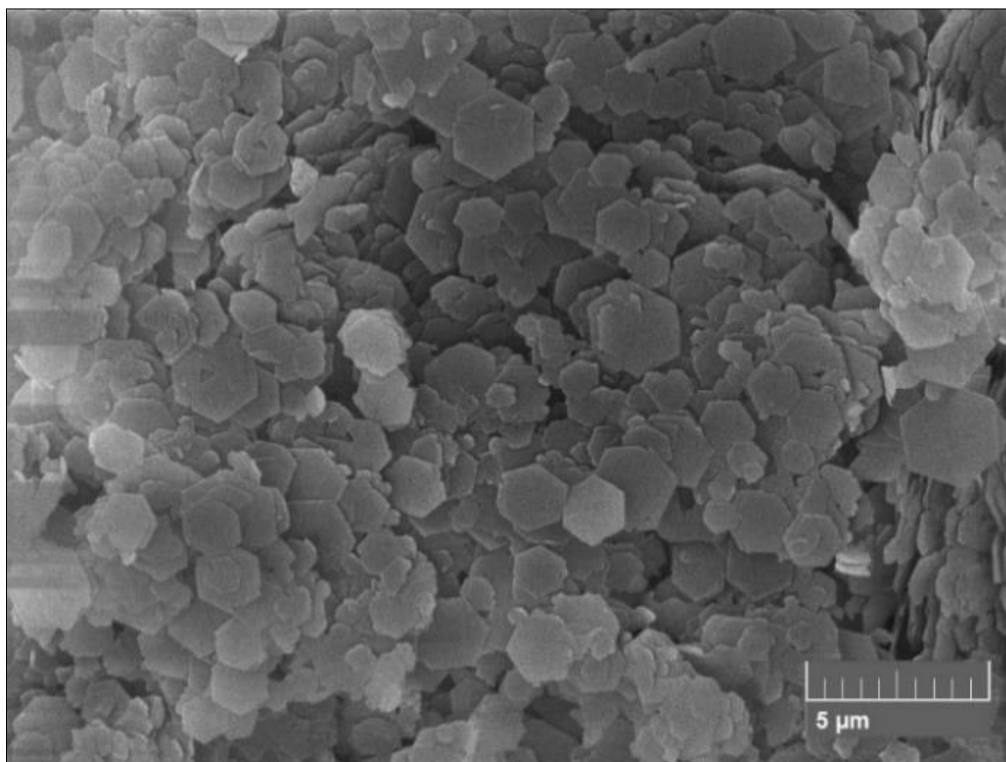

**Figure S7:** SEM images of LDH-NO<sub>3</sub>.

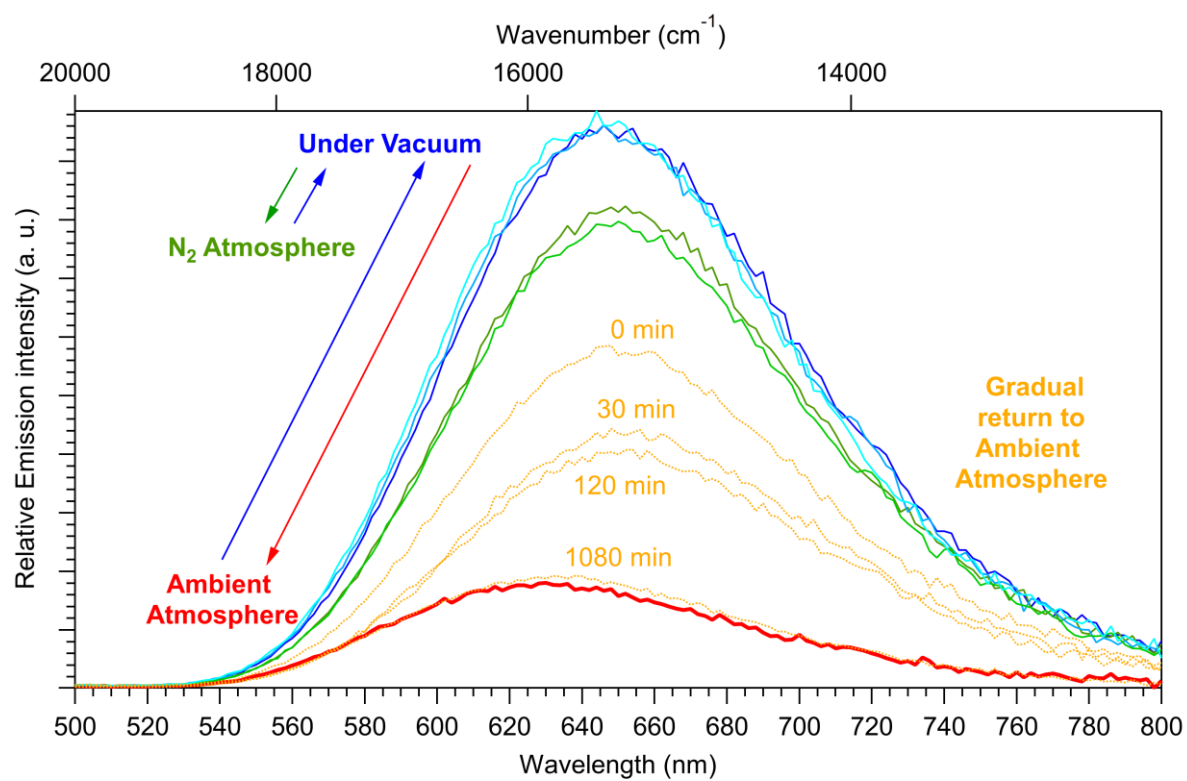

**Figure S8:** Solid state normalized emission ( $\lambda_{\text{ex}} = 360 \text{ nm}$ ,  $T=293\text{K}$ ) spectra with O<sub>2</sub>, vacuum or N<sub>2</sub> atmosphere after storage of compound **1** for one year in the ambient atmosphere.



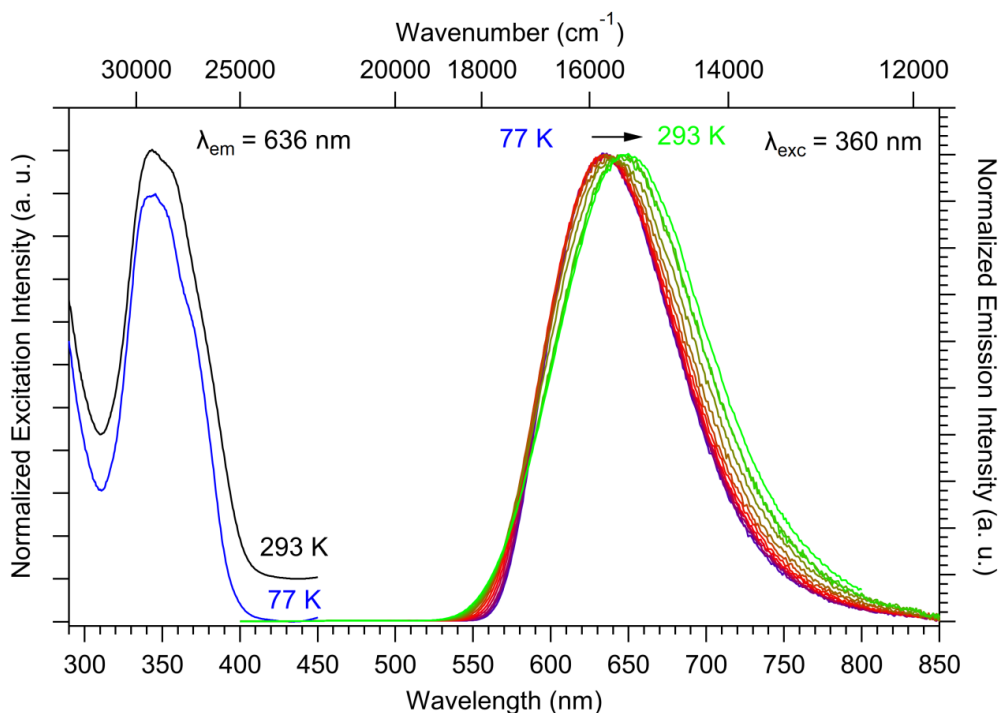

**Figure S9:** Solid-state normalized excitation ( $\lambda_{\text{em}} = 636 \text{ nm}$ ) and emission spectra ( $\lambda_{\text{em}} = 360 \text{ nm}$ ) vs temperature (77 - 293 K) of **1** with N<sub>2</sub> atmosphere. The excitation spectrum at 293 K is shifted by +0.01 on the normalized y-axis for clarity.

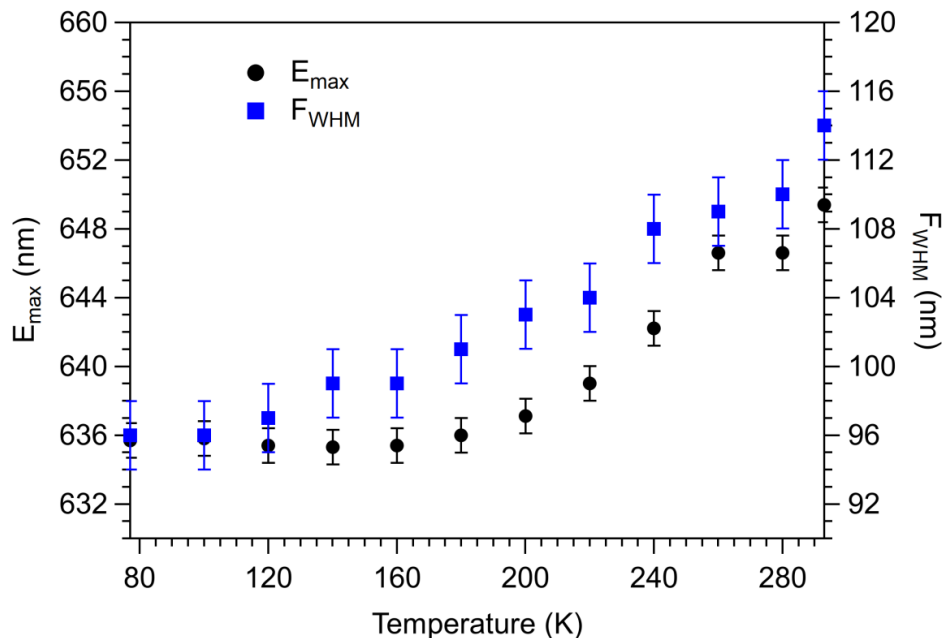

**Figure S10:** The energy band maxima  $E_{\text{max}}$  (left axis, in nm) and  $F_{\text{WHM}}$  (right axis, in nm) vs temperature (77 - 293 K) upon photoexcitation at 360 nm of **1** with N<sub>2</sub> atmosphere. Error bar = 1 or 2 nm for  $E_{\text{max}}$  and  $F_{\text{WHM}}$ , respectively.

<sup>i</sup> L. J. Farrugia, *J. Appl. Crystallogr.*, **45** (2012) 849.
